# Supplementary material for: Integrated Counts of Carbohydrate-Active Protein Domains as Metabolic Readouts to Distinguish Probiotic Biology and Human Fecal Metagenomes
Source: PubMed Central journal article supplement (PMC6856387; doi:10.1038/s41598-019-53173-7), 2019-11-14
Supplement: 41598_2019_53173_MOESM1_ESM.pdf [file 41598_2019_53173_MOESM1_ESM.pdf]

# Integrated Counts of Carbohydrate-Active Protein Domains as Metabolic Readouts to Distinguish Probiotic Biology and Human Fecal Metagenomes

Hong-Hsing Liu, Yu-Chen Lin, Chen-Shuan Chung, Kevin Liu, Ya-Hui Chang, Chung-Hsiang Yang, Yun Chen, Yen-Hsuan Ni, and Pi-Feng Chang

## Supplementary Figure S1. Summaries of next-generation sequencing results. (A)

Read numbers of 16S rRNA amplicons from patients at all three time points were tabulated.

(B) Saturating curves of distinct OTUs as averaged from 10 random selections at given

depths were plotted for all patients. (C) Read numbers of shotgun metagenome sequencing

from samples before and 1-month after *CBM588* ingestions were summarized. (D) Read

numbers of the *CBM588* shotgun genome were listed. (E) 16S sequences as extracted from

*CBM588* shotgun genome sequences were shown.

## Supplementary Figure S2. Pipelines in the study. (A) 16S rRNA amplicons were

categorized into OTUs and 10 rarefied datasets were prepared for diversity analyses,

taxonomic signature selections, and metagenome function inferences. (B) Domain fractions

per million amino acids per 250 nucleotides (DFPMAA<sub>250</sub>) from shotgun sequences was

defined.

## Supplementary Figure S3. Taxonomic evaluations of fecal microbiota associated with *CBM588* ingestions for 1 week. (A) OTU diversities at 1 week were evaluated with Hill

numbers. Both dashed (before) and solid (1-week after) curves nearly overlapped, implying

absences of dominant OTUs after *CBM588* ingestions. At  $q = 0$ , Hill numbers equal  $\alpha$

diversity, which increased from  $226.3 \pm 2.6$  to  $251.0 \pm 3.2$  (SD) as estimated from 10

rarefied datasets. (B) 1-week exposure of *CBM588* brought about relatively minor shifts of

OTU profiles on principal component analyses for most patients. Samples from the same

patient were designated with the same color. Circles (before) and triangles (1-week after)

were close-by for most patients. (C) Percentages of five phyla, including *Actinobacteria*,

*Bacteroidetes*, *Firmicutes*, *Proteobacteria*, and *Verrucomicrobia* showed discernible shifts at

1-week after *CBM588* ingestions, which were compatible with 1-month evaluations. (D) Four

families, including *Bacteroidaceae*, *Enterobacteriaceae*, *Veillonellaceae*, and *Clostridiaceae*

had noticeable changes after 1-week exposures to *CBM588*, which were concordant with 1-

month assessments.

## Supplementary Figure S4. OTU diversities in Hill numbers. (A) Samples before or 1-

week after *CBM588* ingestions were plotted for all 10 rarefied datasets. Both curves almost

overlapped. (B) Samples before or 1-month after *CBM588* ingestions were plotted for all 10

rarefied datasets. Few distinctions were found for the two curves.

**Supplementary Figure S5. Principal component analyses of OTUs.** (A) Samples before or 1-week after *CBM588* ingestions were plotted for all 10 rarefied datasets. Shifts were relatively minor between the pre-exposure samples (circles) and the post-exposure samples (triangles). Different patients were designated with different colors. (B) Samples before or 1-month after *CBM588* ingestions were plotted for all 10 rarefied datasets. Shifts were apparent after *CBM588* administrations (circles vs. triangles of the same color).

**Supplementary Figure S6.** Principal component analyses of 16S rRNA-inferred KEGG functional pathways. Most patients showed distinct shifts between samples before (circles) and 1-month after (triangles) *CBM588* ingestions.

**Supplementary Figure S7.  $\sum$ DFPMAA<sub>250</sub> vs. mean read lengths of shotgun bacteria genomes.** (A) Shotgun genome sequences of *CBM588* were randomly and systematically shortened in sets of 10 rarefactions to evaluate impacts of mean read lengths to the calculations of  $\sum$ DFPMAA<sub>250</sub> values. DFPMAA without the 250 subscript denotes values without normalization to 250 nucleotides. It was found the mean read lengths could be shortened up to 187.6 bp without apparent deviations of  $\sum$ DFPMAA<sub>250</sub> estimates. (B) The mean read lengths of 10 rarefactions from all bacteria evaluated were tabulated. For fair comparisons the mean read lengths of the *CBM588* genome were artificially made the shortest.

**Supplementary Python scripts.** Scripts for UNIX-like platforms are provided to demonstrate the calculation of  $\sum$ DFPMAA<sub>250</sub>. Please find README.txt to setup a required environment. Two datasets and relevant Hidden Markov Models will be downloaded from the cloud automatically.

**A**

|            | P1     |        |         | P2     |        |         | P3      |         |         | P4      |         |         |
|------------|--------|--------|---------|--------|--------|---------|---------|---------|---------|---------|---------|---------|
| 2 x 300 bp | Before | 1 Week | 1 Month | Before | 1 Week | 1 Month | Before  | 1 Week  | 1 Month | Before  | 1 Week  | 1 Month |
| 16S rDNA   | 72,227 | 79,374 | 82,155  | 86,270 | 80,983 | 429,475 | 494,020 | 446,119 | 446,297 | 356,653 | 383,552 | 446,393 |

  

|            | P5      |         |         | P6      |         |         | P7      |         |         |
|------------|---------|---------|---------|---------|---------|---------|---------|---------|---------|
| 2 x 300 bp | Before  | 1 Week  | 1 Month | Before  | 1 Week  | 1 Month | Before  | 1 Week  | 1 Month |
| 16S rDNA   | 511,849 | 313,626 | 348,420 | 401,686 | 484,825 | 459,553 | 391,518 | 313,261 | 527,496 |

**B**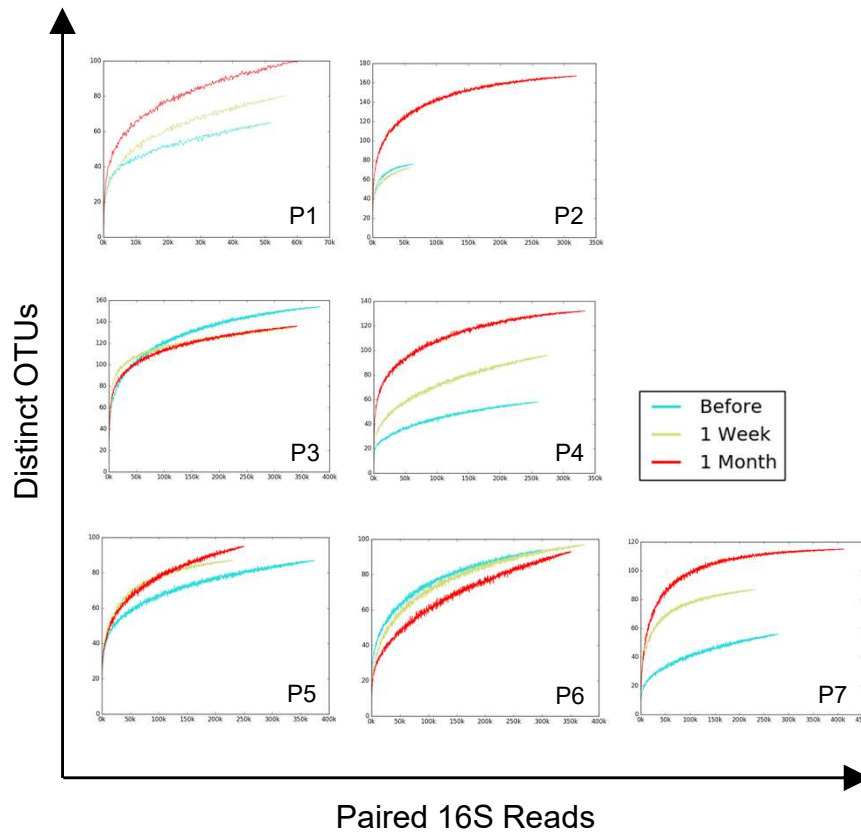**C**

|            | P2         |            |
|------------|------------|------------|
| 2 x 150 bp | Before     | 1 Month    |
| Shotgun    | 51,070,300 | 55,507,257 |

  

|            | P3         |            |
|------------|------------|------------|
| 2 x 150 bp | Before     | 1 Month    |
| Shotgun    | 22,223,651 | 38,042,942 |

  

|            | P5         |            |
|------------|------------|------------|
| 2 x 150 bp | Before     | 1 Month    |
| Shotgun    | 38,842,344 | 50,317,113 |

**D**

| 2 x 150 bp | <i>CBM588</i> |
|------------|---------------|
| Shotgun    | 425,793       |

**E**

```

> CBM588 16S
TGTTTGTCCCCACGCTTTCGAGCCTCAGTGTACAGTCCAGAAAGGCGCCTTCGCCACTGGTAT
TCTTCCTAATCTCTACGCATTTACCAGCTACACTAGGAATTCCTTTCCTCTCCTGCACTCTAGATAT
CCAGTTTGAATGCAGCACCCAGGTTAAGCCCGGTATTTACATCCCACCTAAATATCCACCTACGCT
CCCTTTACGCCAGTAAATCCGGACAACGCTTGCCACCTACGTATTACCGGGCTGCTGGCACGTAGTT
AGCCGTGGCTTCTCCTTAGGTACCGTCATTATCGTCCCTAAAGACAGAGCTTTACAATCCGAAGACCG
TCATCACTACGCGGCTTGCTGCATCAGGGTTCCCCATTGTGCAATATTCCCA

```

**A**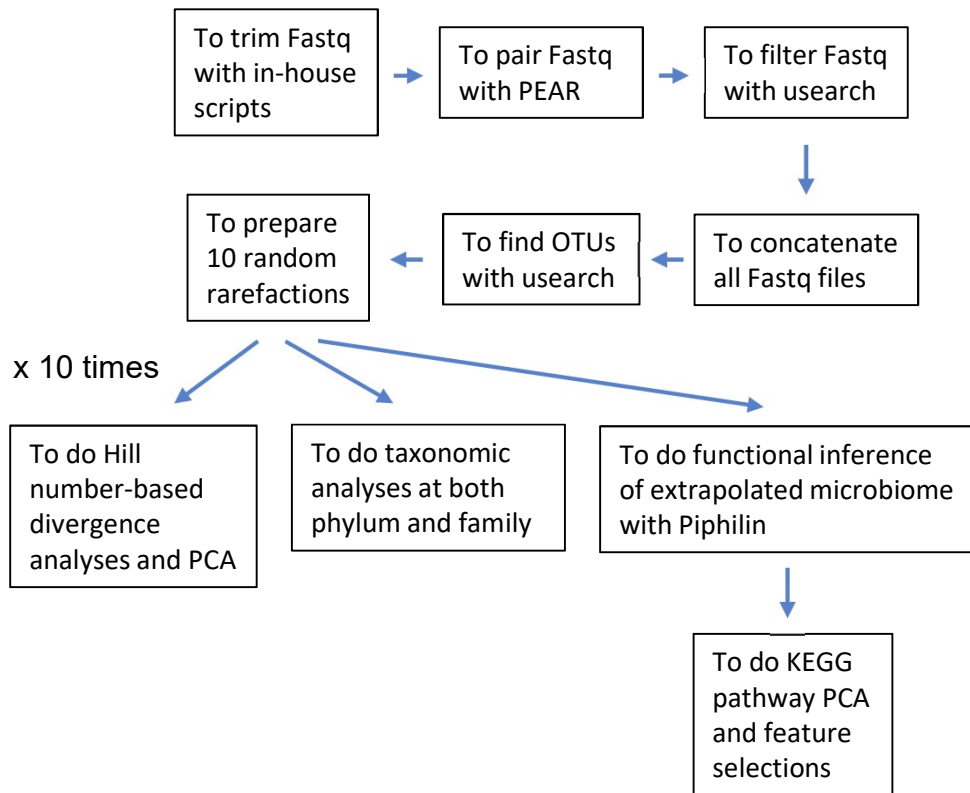**B**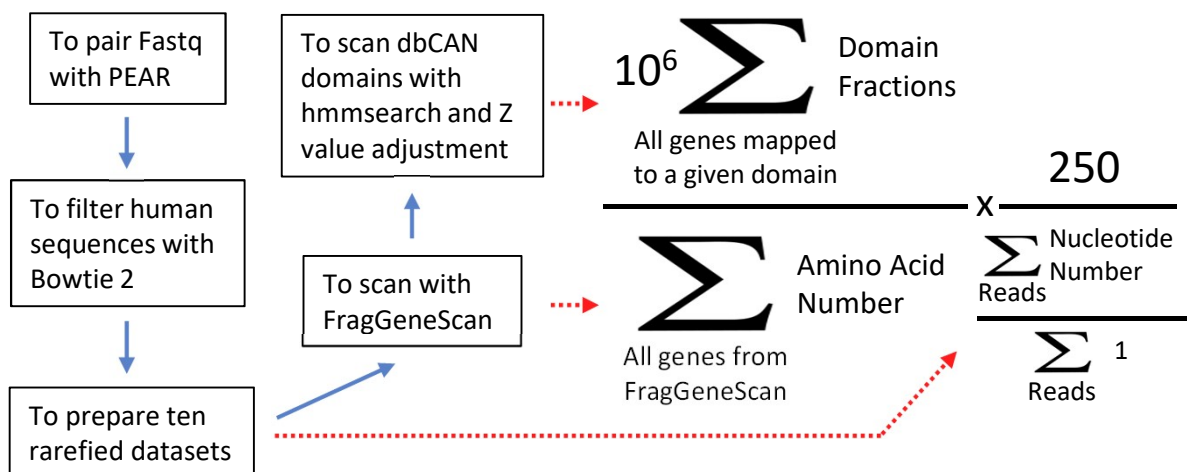

Domain Fractions per Million Amino Acids per 250 Nucleotides (DFPMAA<sub>250</sub>)

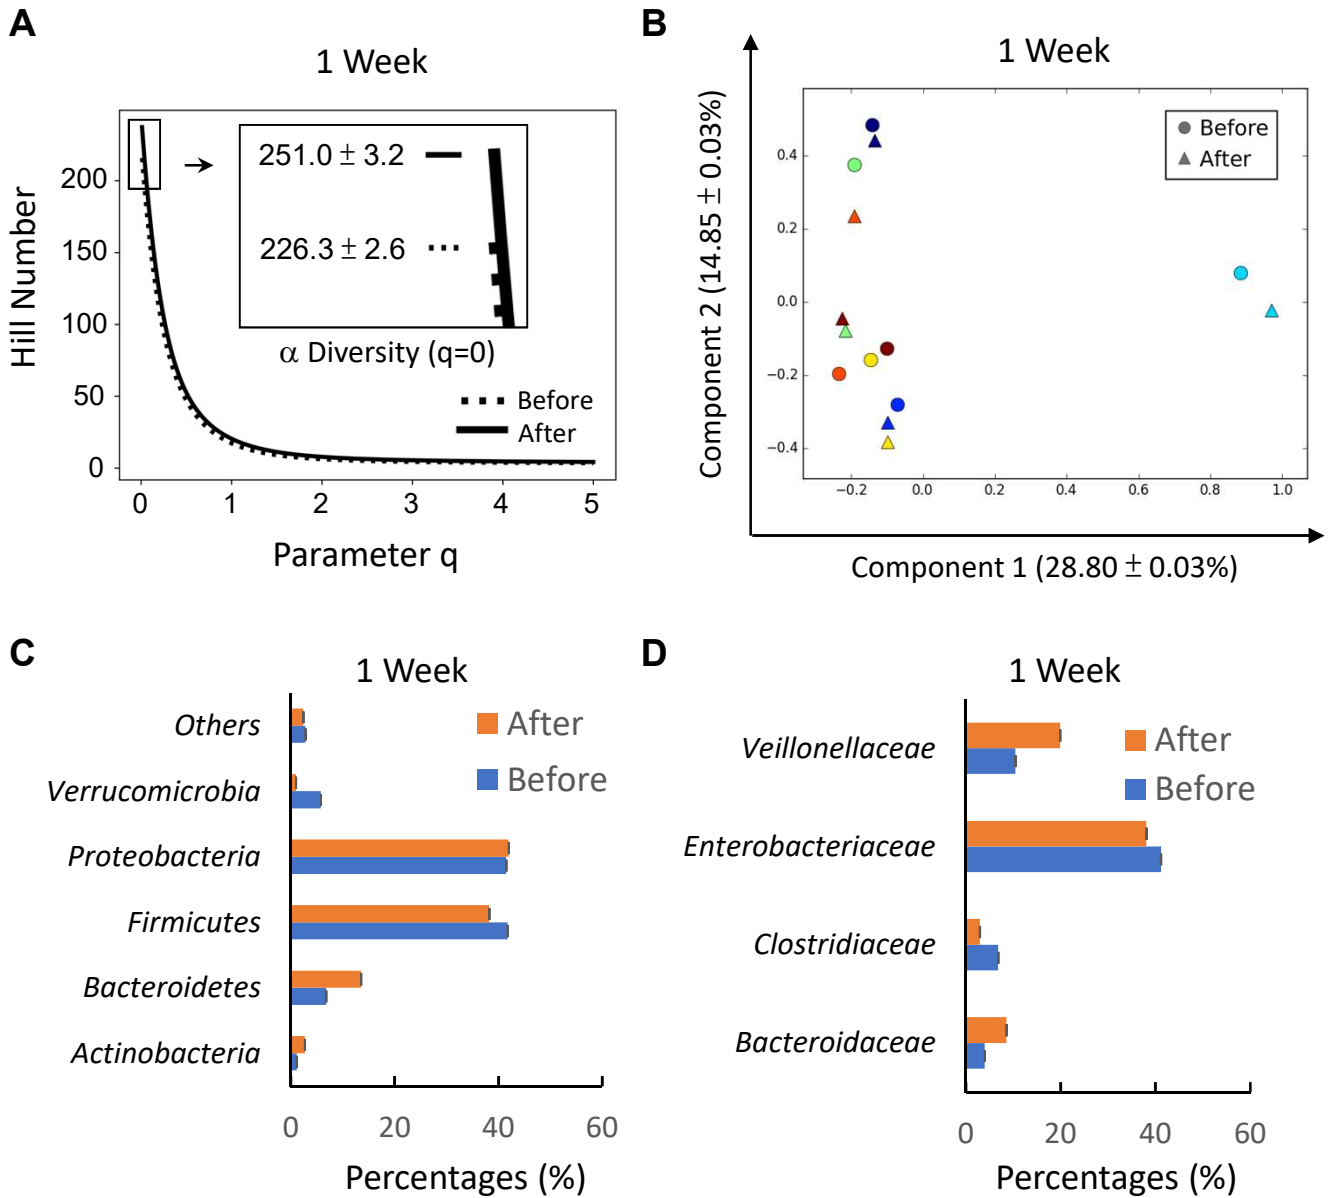

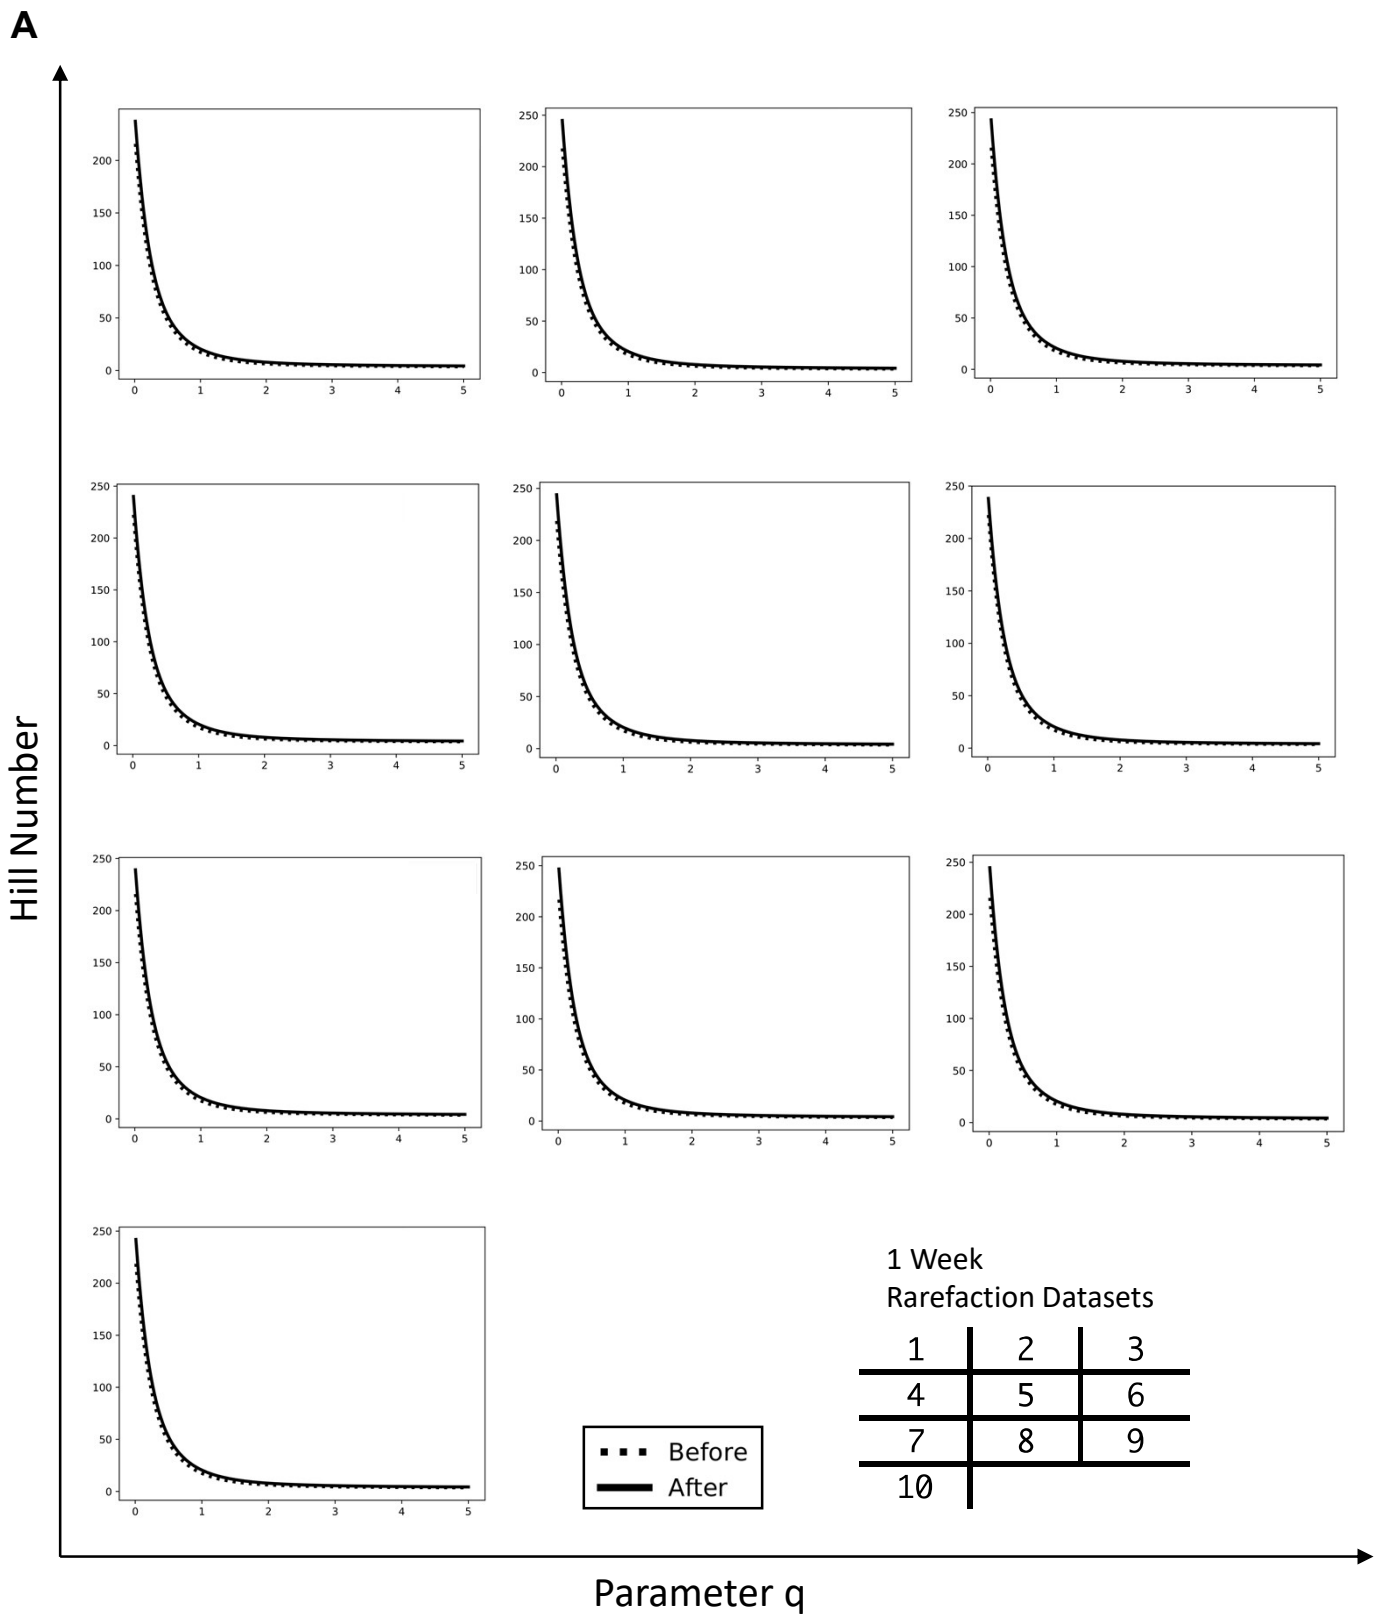

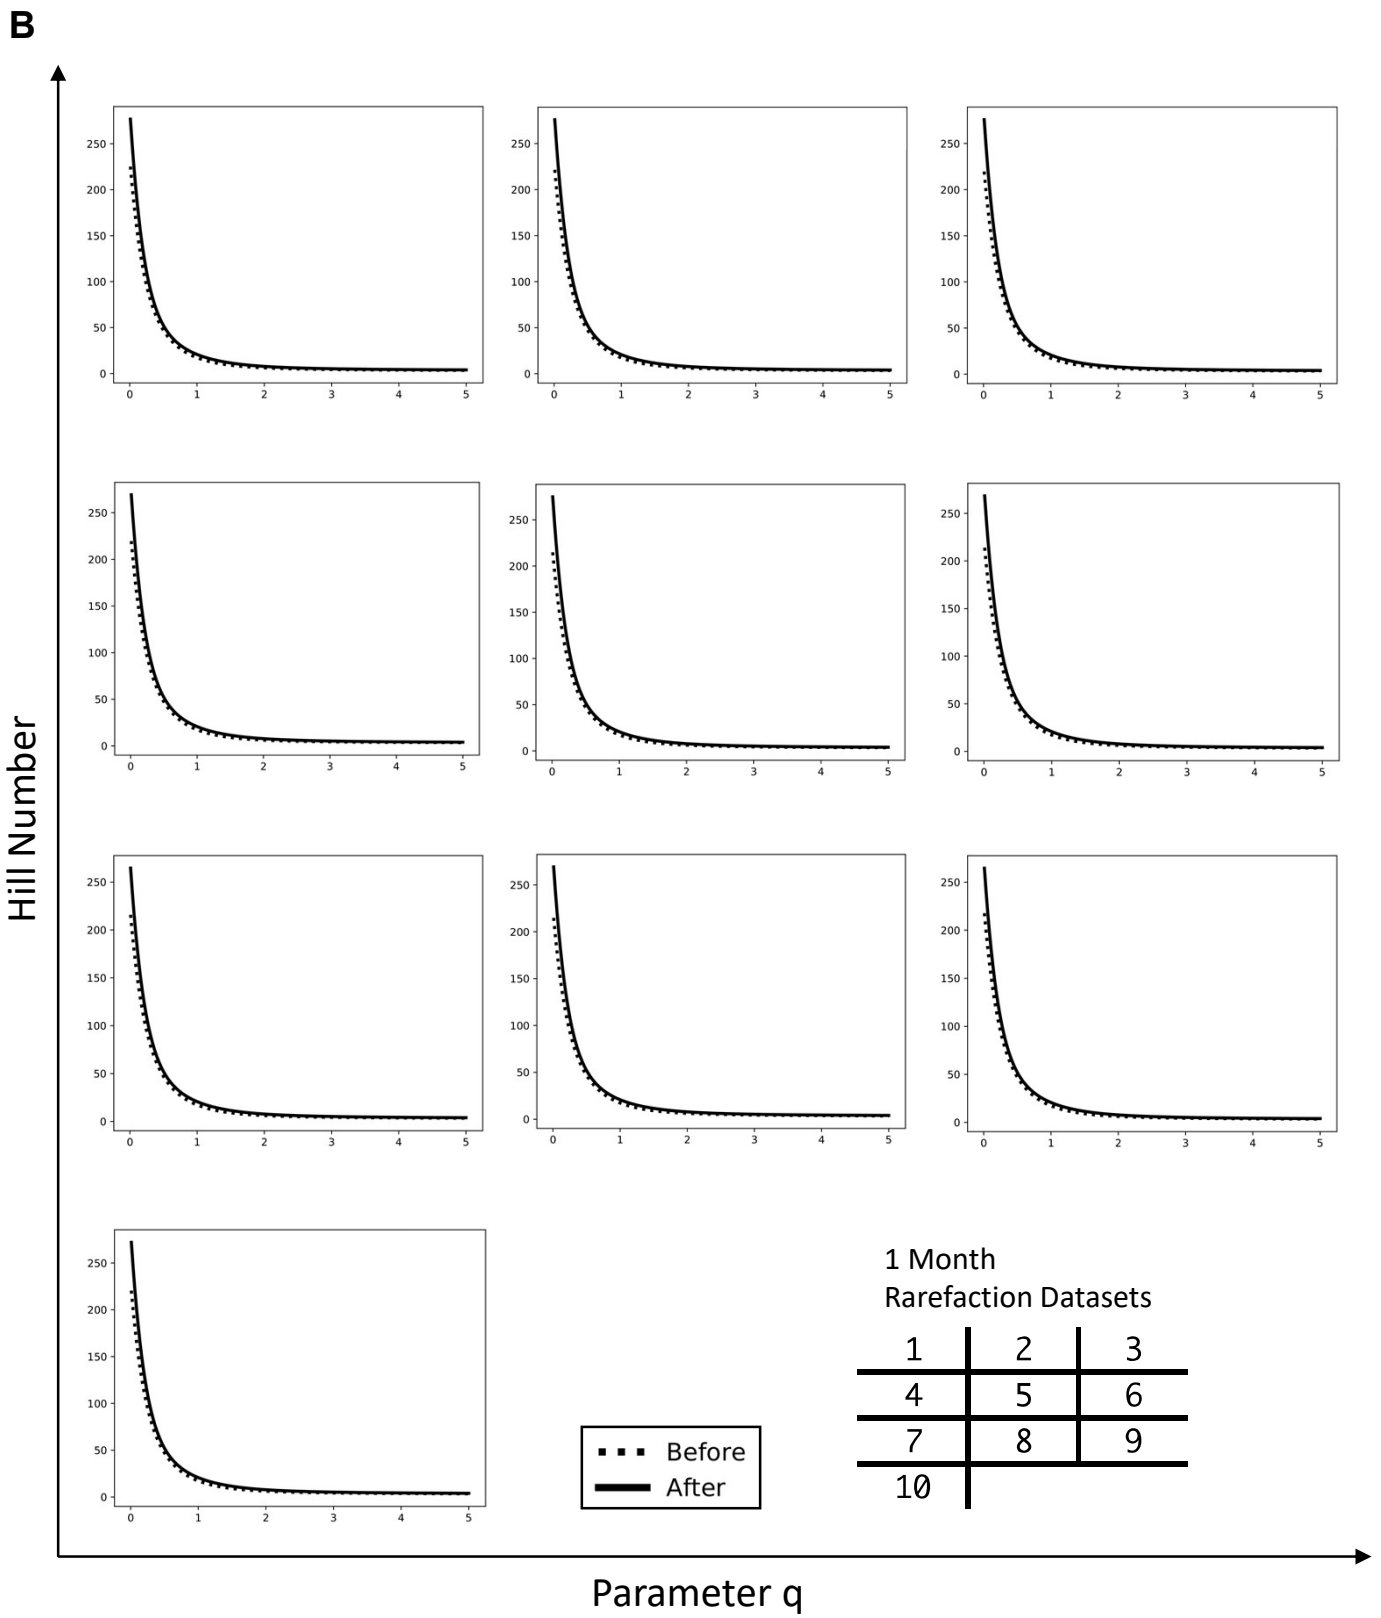

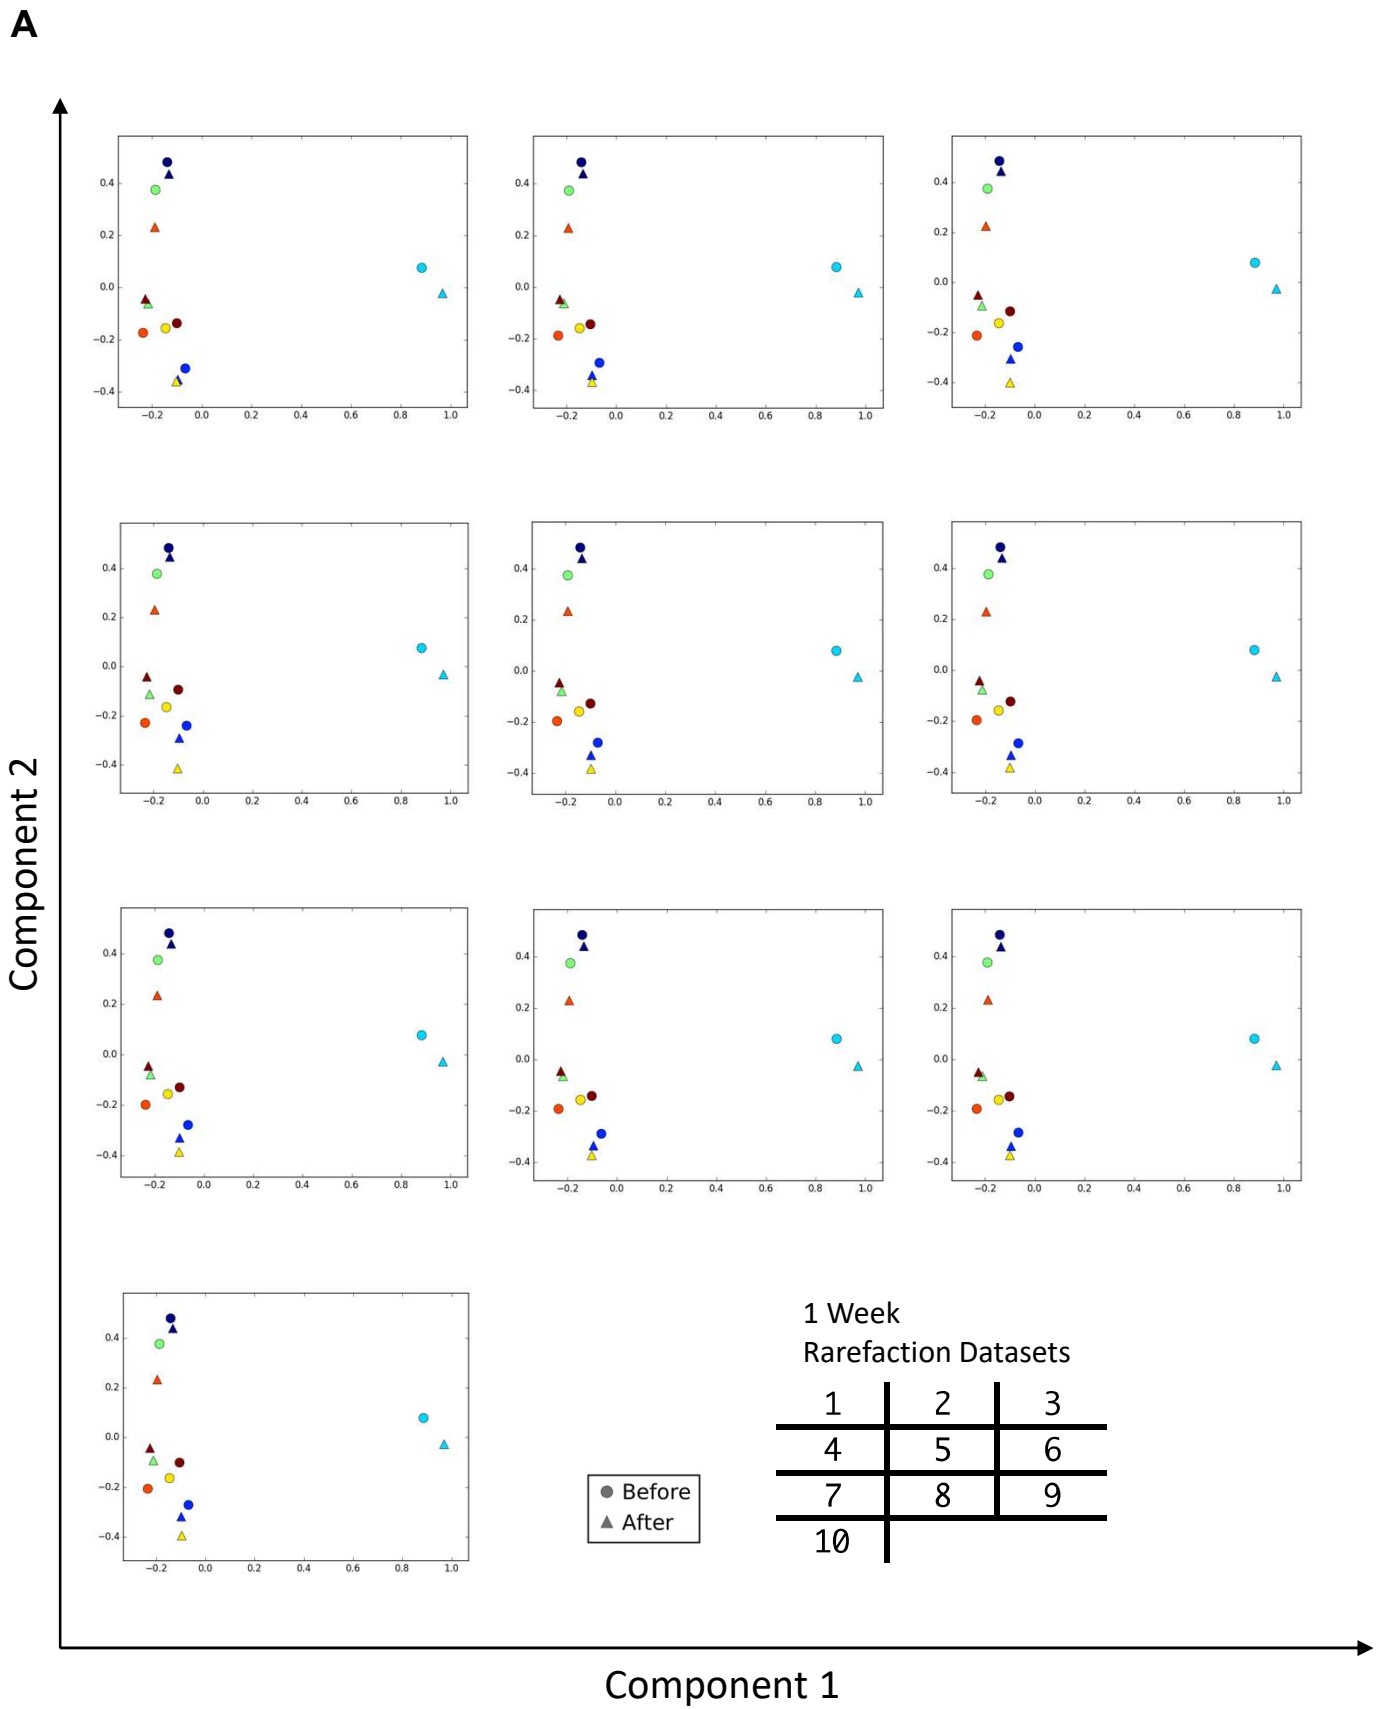



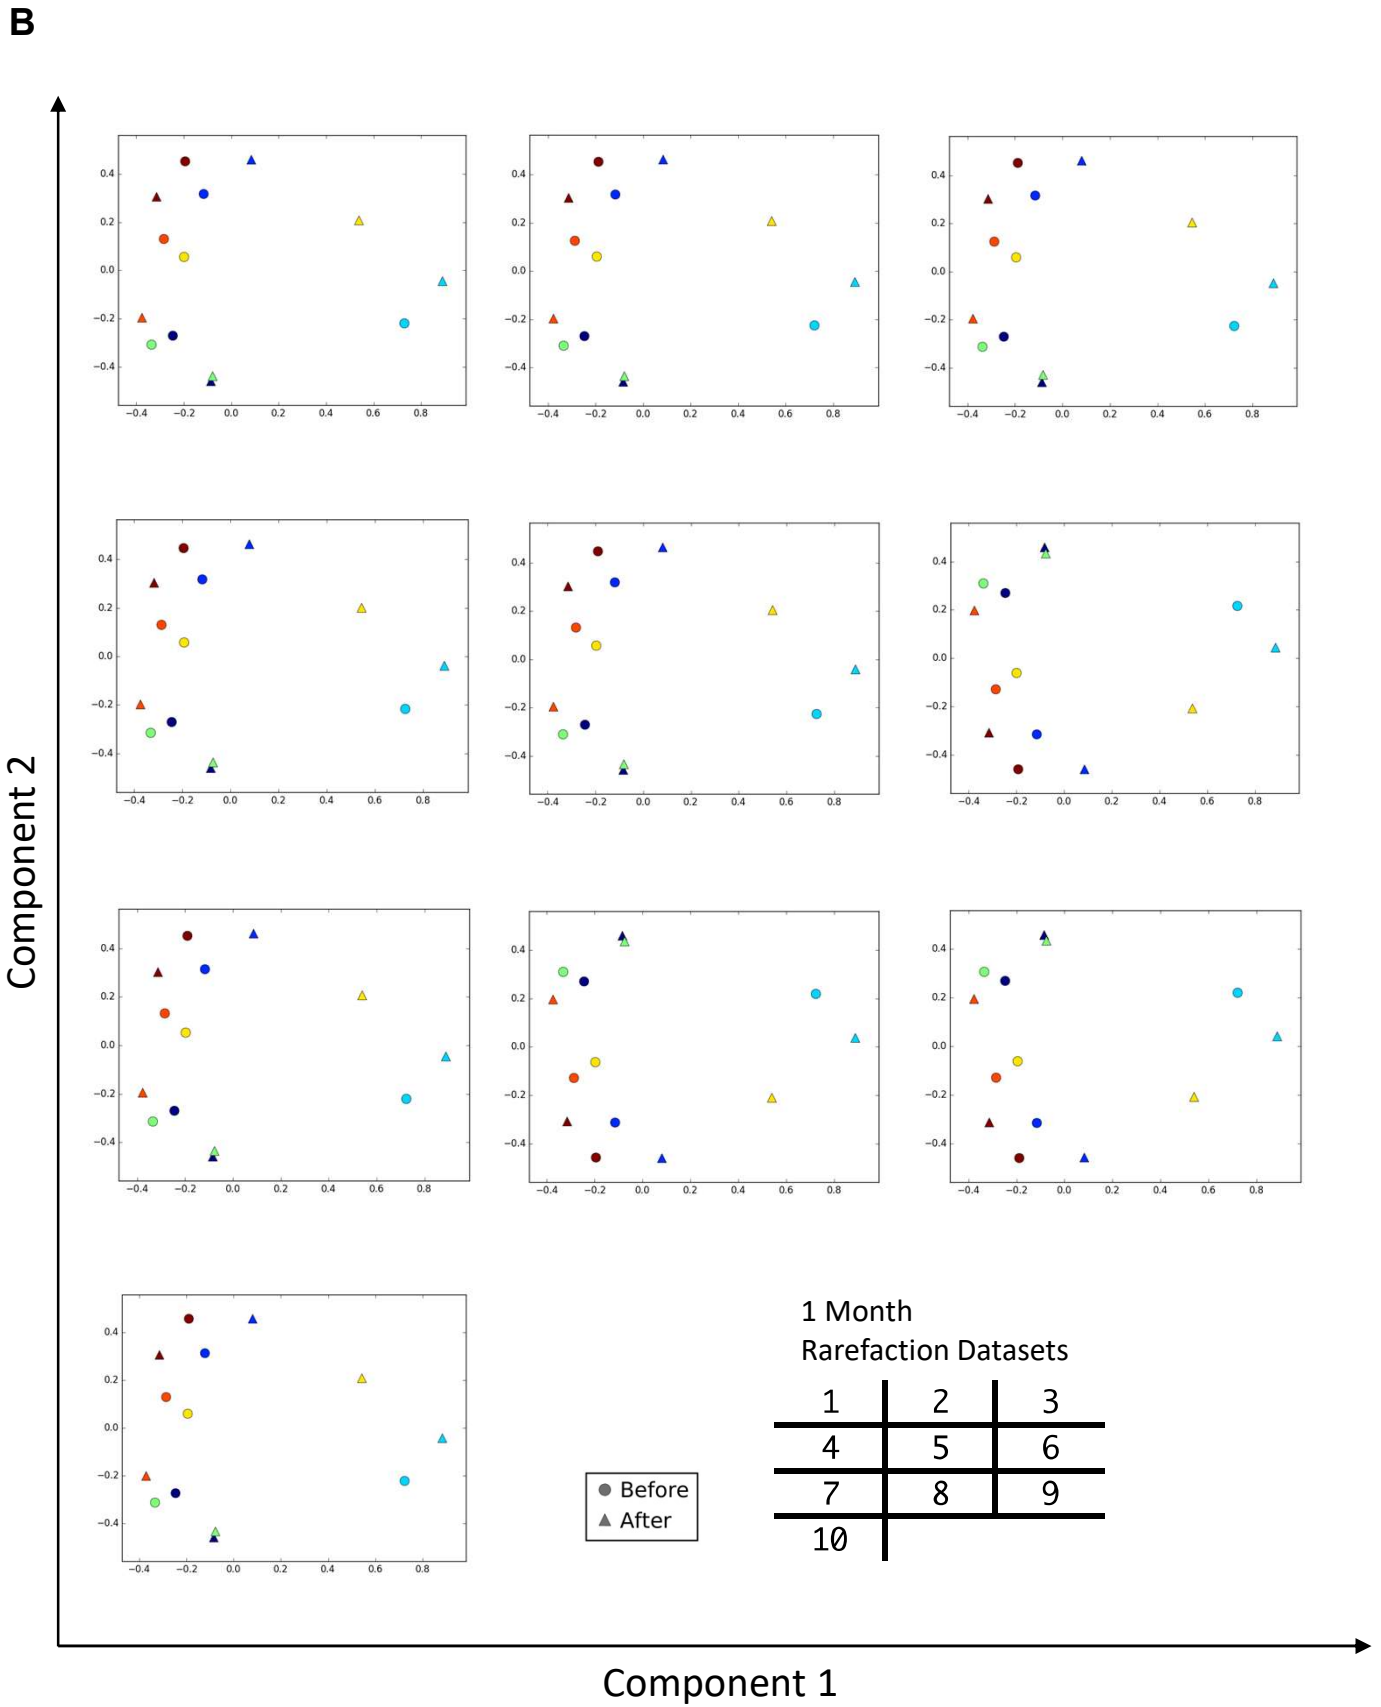

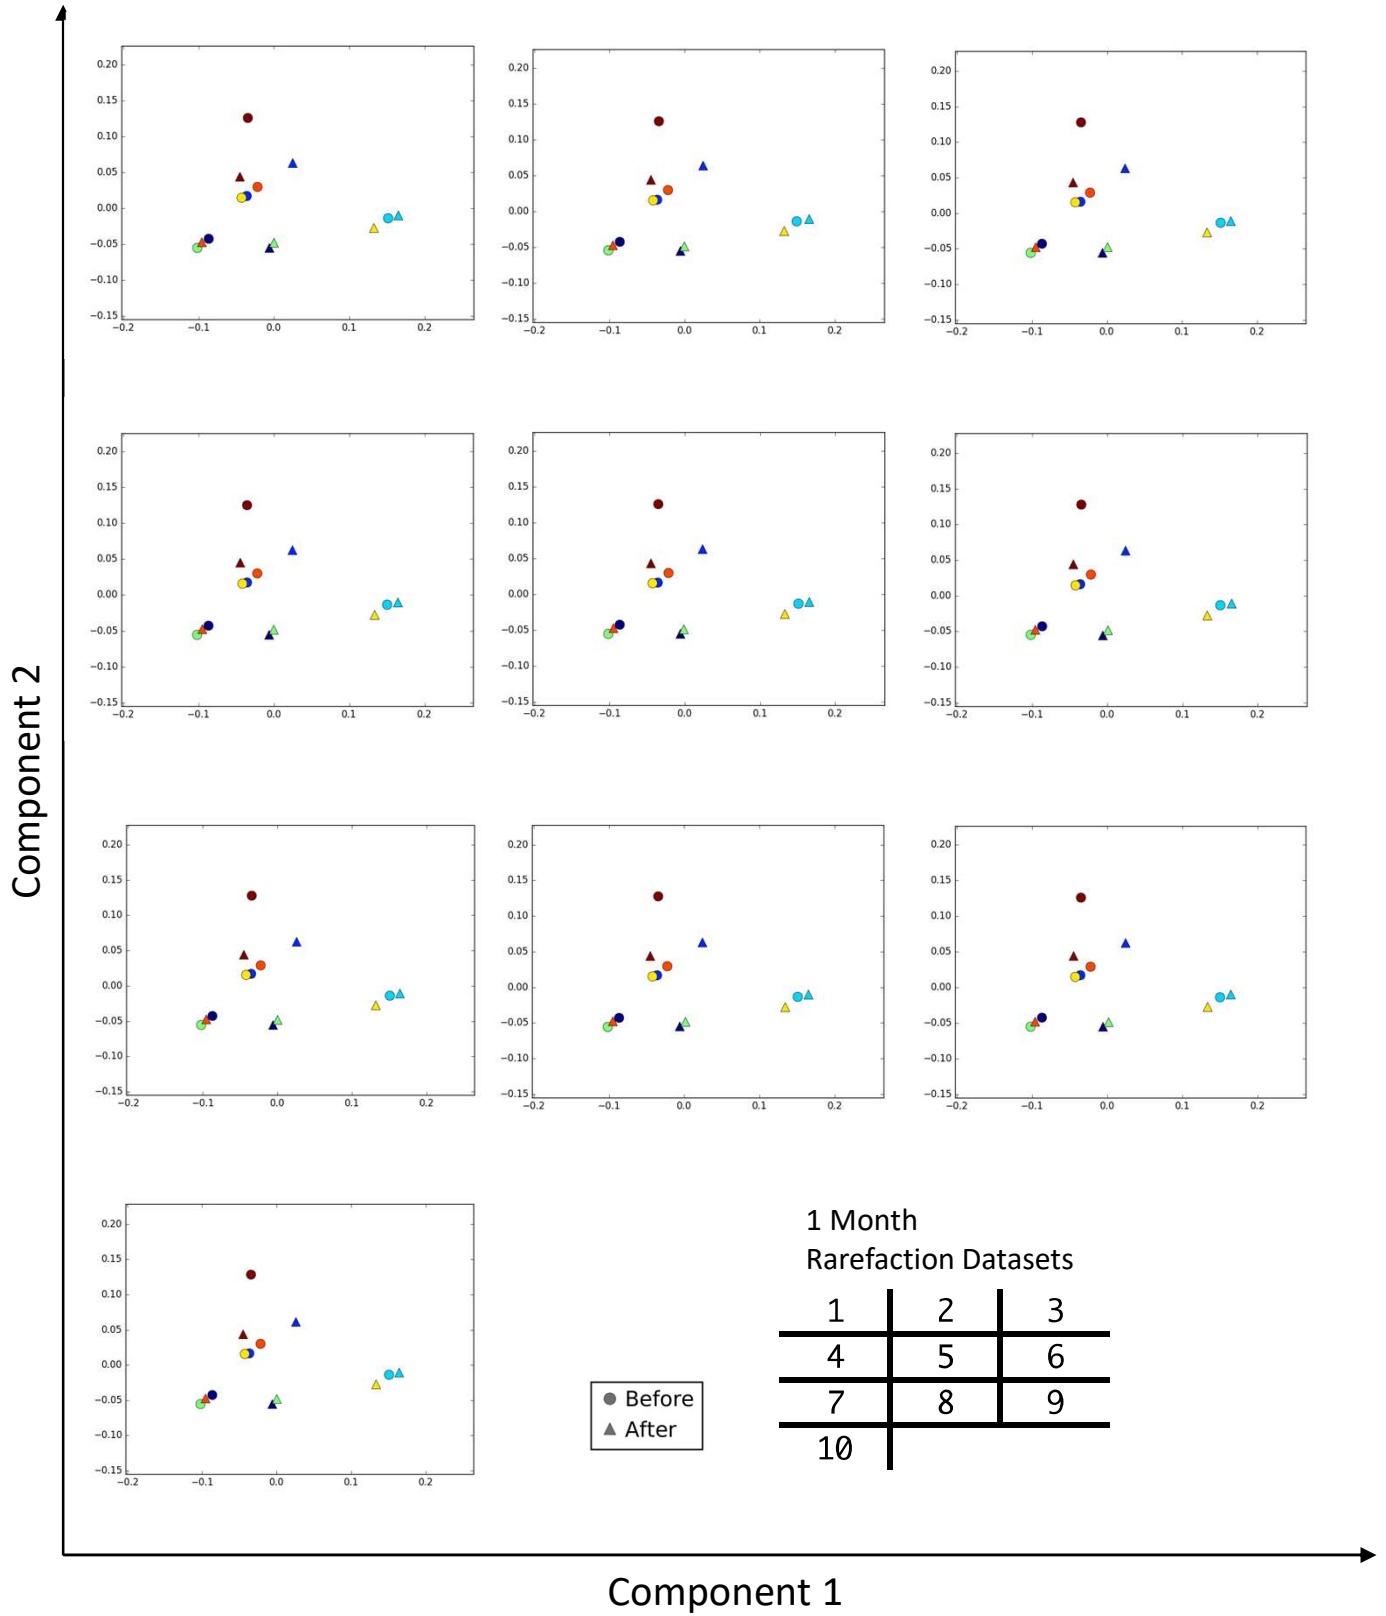

A

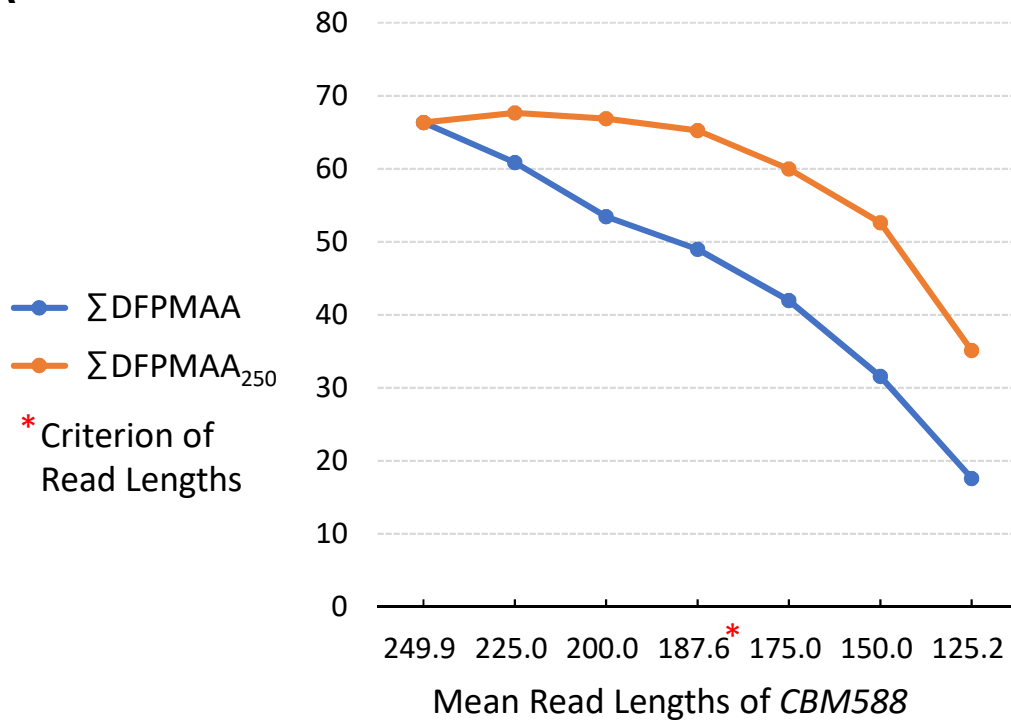

B

|                                   | CBM588* | ATCC 17978 | ATCC 700802 | ATCC 700926 | ATCC 51907 | ATCC 700721 | NCTC 11192 | Cam. Salmonella | ATCC BAA-611 | ATCC BAA-334 |
|-----------------------------------|---------|------------|-------------|-------------|------------|-------------|------------|-----------------|--------------|--------------|
| Mean Read Lengths of Rarefactions | 187.6   | 195.1      | 211.3       | 189.8       | 188.2      | 196.1       | 196.1      | 191.8           | 191.5        | 189.4        |
|                                   | 187.6   | 195.1      | 210.8       | 189.7       | 188.1      | 196.1       | 195.9      | 191.8           | 191.5        | 189.0        |
|                                   | 187.6   | 194.9      | 210.6       | 189.3       | 188.3      | 196.1       | 196.3      | 191.4           | 191.5        | 189.0        |
|                                   | 187.6   | 194.9      | 210.9       | 189.6       | 188.6      | 195.9       | 196.1      | 192.0           | 191.7        | 189.1        |
|                                   | 187.6   | 194.8      | 211.3       | 189.3       | 188.2      | 196.1       | 196.0      | 191.8           | 191.4        | 189.0        |
|                                   | 187.6   | 194.7      | 211.0       | 189.9       | 188.0      | 195.9       | 195.8      | 191.7           | 191.5        | 189.1        |
|                                   | 187.6   | 194.9      | 211.3       | 189.6       | 188.4      | 195.7       | 195.9      | 191.8           | 191.8        | 189.5        |
|                                   | 187.6   | 194.8      | 211.0       | 190.0       | 188.5      | 195.7       | 196.0      | 191.8           | 191.5        | 189.5        |
|                                   | 187.6   | 194.6      | 210.9       | 189.8       | 188.8      | 195.6       | 196.1      | 192.2           | 191.2        | 189.5        |
|                                   | 187.6   | 194.9      | 211.1       | 189.9       | 188.5      | 195.6       | 196.1      | 192.1           | 191.4        | 189.0        |

\* Before calculations of DFPMAA<sub>250</sub> read lengths of CBM588 were randomly shorted by a factor 0.75 from the original set.

\*\* There were 90,164 reads per strain in each rarefaction.
